# Supplementary material
Source: publisher figshare collection journal article supplement (https://asha.figshare.com/articles/dataset/_/21714368)
Supplement: Supplementary file 2 [file 1]

**Supplemental Material S1.** Moderated associations between caregiver language input and language covarying caregiver stress.

|                         | Values from Full Multiple Regression Model<br>Predicting Expressive Language |             |                          |                                | Values from Full Multiple Regression Model Predicting<br>Receptive Language |             |                          |                                |
|-------------------------|------------------------------------------------------------------------------|-------------|--------------------------|--------------------------------|-----------------------------------------------------------------------------|-------------|--------------------------|--------------------------------|
|                         | $\beta$ PSI                                                                  | $\beta$ AWC | $\beta$ Sibling<br>Group | $\beta$ AWC *<br>Sibling Group | $\beta$ PSI                                                                 | $\beta$ AWC | $\beta$ Sibling<br>Group | $\beta$ AWC *<br>Sibling Group |
| PSI Overall Raw Score   | 0.26*                                                                        | -0.23       | -0.10                    | 0.90                           | 0.17                                                                        | 0.19        | 0.17                     | 0.51                           |
| PSI General Distress    | 0.22                                                                         | -0.27       | -0.10                    | 0.89                           | 0.20                                                                        | 0.14        | 0.17                     | 0.53                           |
| PSI Parenting Distress  | 0.29*                                                                        | -0.23       | -0.12                    | 0.90                           | 0.24*                                                                       | 0.18        | 0.15                     | 0.53                           |
| PSI Rewards Parent      | 0.21                                                                         | -0.10       | 0.03                     | 0.69                           | 0.14                                                                        | 0.27        | 0.26                     | 0.37                           |
| PSI Child Demandingness | 0.18                                                                         | -0.29       | -0.20                    | 0.98                           | 0.06                                                                        | 0.16        | 0.14                     | 0.51                           |
| PSI Difficult Child     | 0.16                                                                         | -0.24       | -0.10                    | 0.86                           | 0.05                                                                        | 0.18        | 0.18                     | 0.46                           |

*Note.* PSI = Parenting Stress Index Short Form, Fourth Edition (Abidin, 1995);  $\beta$  = Standardized correlation coefficients from multiple regression models; AWC = Adult Word Count derived from LENA (Language ENvironment Analysis). These results correspond to the “b paths” in our hypothesized indirect effects model.

\* $p < .05$ .
